# Supplementary material for: Anoxia Rapidly Induces Changes in Expression of a Large and Diverse Set of Genes in Endothelial Cells
Source: MDPI journal article supplement (doi:10.3390/ijms24065157), 2023-03-08

## ***Supplementary Material***

The 50 most variable genes (plus VEGFA gene) obtained by BMR transcriptome analysis were used as query in the Reactome software tool to analyze a database of cellular molecular pathways where genes modulated in anoxic native HUVEC (S2) (**Figure S1**), anoxic HUVEC-SIRT6 (S6) (**Figure S2**) versus the respective control samples, and normoxic HUVEC-SIRT6 (S5) respect to normoxic HUVEC-PBP (S3) sample (**Figure S3**) are involved. The tables show the 25 most relevant pathways to which the selected 51 genes belong. In each figure, only the pathways where at least 3 genes are involved have been indicated.

**Figure S1.** Reactome software tool analysis of specific molecular pathways or sub-pathways where some genes of **8h-anoxia** treated native (S2) HUVEC samples (anoxic versus (S1) **normoxic** HUVEC sample) were found among the 25 most relevant pathways. At least 3 genes were found in pool genes involved in specific pathways (indicated by the arrows).

| The following table shows the 25 most relevant pathways sorted by p-value.        |          |          |          |       |           |          |
|-----------------------------------------------------------------------------------|----------|----------|----------|-------|-----------|----------|
| Pathway name                                                                      | Entities |          |          |       | Reactions |          |
|                                                                                   | found    | ratio    | p-value  | FDR*  | found     | ratio    |
| VEGF ligand-receptor interactions                                                 | 2 / 8    | 5.50e-04 | 4.90e-04 | 0.034 | 3 / 4     | 2.96e-04 |
| VEGF binds to VEGFR leading to receptor dimerization                              | 2 / 8    | 5.50e-04 | 4.90e-04 | 0.034 | 2 / 3     | 2.22e-04 |
| Regulation of gene expression by Hypoxia-inducible Factor                         | 2 / 15   | 0.001    | 0.002    | 0.078 | 1 / 7     | 5.18e-04 |
| TFAP2 (AP-2) family regulates transcription of growth factors and their receptors | 2 / 21   | 0.001    | 0.003    | 0.111 | 2 / 18    | 0.001    |
| ⇒ Cellular response to hypoxia                                                    | 3 / 86   | 0.006    | 0.005    | 0.135 | 10 / 20   | 0.001    |
| Defective SLC2A1 causes GLUT1 deficiency syndrome 1 (GLUT1DS1)                    | 1 / 2    | 1.38e-04 | 0.008    | 0.157 | 1 / 1     | 7.40e-05 |
| ATF4 activates genes in response to endoplasmic reticulum stress                  | 2 / 34   | 0.002    | 0.008    | 0.157 | 1 / 7     | 5.18e-04 |
| PERK regulates gene expression                                                    | 2 / 42   | 0.003    | 0.012    | 0.204 | 1 / 11    | 8.14e-04 |
| FOXO-mediated transcription of oxidative stress, metabolic and neuronal genes     | 2 / 49   | 0.003    | 0.017    | 0.204 | 2 / 34    | 0.003    |
| ⇒ Signaling by VEGF                                                               | 3 / 137  | 0.009    | 0.018    | 0.204 | 49 / 86   | 0.006    |
| ⇒ Platelet degranulation                                                          | 3 / 139  | 0.01     | 0.018    | 0.204 | 1 / 11    | 8.14e-04 |
| Transcriptional regulation by the AP-2 (TFAP2) family of transcription factors    | 2 / 52   | 0.004    | 0.019    | 0.204 | 2 / 44    | 0.003    |
| ⇒ Response to elevated platelet cytosolic Ca <sup>2+</sup>                        | 3 / 146  | 0.01     | 0.021    | 0.207 | 1 / 14    | 0.001    |
| Toxicity of botulinum toxin type E (botE)                                         | 1 / 8    | 5.50e-04 | 0.031    | 0.209 | 3 / 5     | 3.70e-04 |
| Lactose synthesis                                                                 | 1 / 8    | 5.50e-04 | 0.031    | 0.209 | 1 / 3     | 2.22e-04 |
| Release of apoptotic factors from the mitochondria                                | 1 / 8    | 5.50e-04 | 0.031    | 0.209 | 1 / 4     | 2.96e-04 |
| SMAC, XIAP-regulated apoptotic response                                           | 1 / 8    | 5.50e-04 | 0.031    | 0.209 | 1 / 10    | 7.40e-04 |
| O-linked glycosylation of mucins                                                  | 2 / 73   | 0.005    | 0.035    | 0.209 | 1 / 17    | 0.001    |
| Defective CHST14 causes EDS, musculocontractural type                             | 1 / 9    | 6.19e-04 | 0.035    | 0.209 | 1 / 1     | 7.40e-05 |
| Defective CHST3 causes SEDCJD                                                     | 1 / 9    | 6.19e-04 | 0.035    | 0.209 | 1 / 1     | 7.40e-05 |
| Toxicity of botulinum toxin type D (botD)                                         | 1 / 9    | 6.19e-04 | 0.035    | 0.209 | 3 / 5     | 3.70e-04 |
| Toxicity of botulinum toxin type F (botF)                                         | 1 / 9    | 6.19e-04 | 0.035    | 0.209 | 3 / 5     | 3.70e-04 |
| Defective CHSY1 causes TPBS                                                       | 1 / 10   | 6.88e-04 | 0.039    | 0.209 | 2 / 2     | 1.48e-04 |
| Calcitonin-like ligand receptors                                                  | 1 / 11   | 7.56e-04 | 0.043    | 0.209 | 1 / 4     | 2.96e-04 |
| Ficolins bind to repetitive carbohydrate structures on the target cell surface    | 1 / 12   | 8.25e-04 | 0.047    | 0.209 | 3 / 3     | 2.22e-04 |

**Figure S2** Reactome software tool analysis of specific molecular pathways or sub-pathways where some genes of **8h-anoxia** treated (S6) HUVEC-**SIRT6** (versus normoxic (S5) HUVEC-**SIRT6** sample) were found among the 25 most relevant pathways. At least 3 genes were found in pool genes involved in specific pathways (indicated by the arrows).

| The following table shows the 25 most relevant pathways sorted by p-value.        |          |          |          |       |           |          |
|-----------------------------------------------------------------------------------|----------|----------|----------|-------|-----------|----------|
| Pathway name                                                                      | Entities |          |          |       | Reactions |          |
|                                                                                   | found    | ratio    | p-value  | FDR*  | found     | ratio    |
| VEGF ligand-receptor interactions                                                 | 2 / 8    | 5.50e-04 | 4.73e-04 | 0.024 | 3 / 4     | 2.96e-04 |
| VEGF binds to VEGFR leading to receptor dimerization                              | 2 / 8    | 5.50e-04 | 4.73e-04 | 0.024 | 2 / 3     | 2.22e-04 |
| Hormone ligand-binding receptors                                                  | 2 / 13   | 8.94e-04 | 0.001    | 0.041 | 2 / 5     | 3.70e-04 |
| Regulation of gene expression by Hypoxia-inducible Factor                         | 2 / 15   | 0.001    | 0.002    | 0.041 | 1 / 7     | 5.18e-04 |
| Regulation of glycolysis by fructose 2,6-bisphosphate metabolism                  | 2 / 18   | 0.001    | 0.002    | 0.047 | 3 / 4     | 2.96e-04 |
| TFAP2 (AP-2) family regulates transcription of growth factors and their receptors | 2 / 21   | 0.001    | 0.003    | 0.051 | 2 / 18    | 0.001    |
| Cellular response to hypoxia                                                      | 3 / 86   | 0.006    | 0.005    | 0.067 | 10 / 20   | 0.001    |
| Defective SLC2A1 causes GLUT1 deficiency syndrome 1 (GLUT1DS1)                    | 1 / 2    | 1.38e-04 | 0.008    | 0.094 | 1 / 1     | 7.40e-05 |
| Signaling by VEGF                                                                 | 3 / 137  | 0.009    | 0.017    | 0.179 | 49 / 86   | 0.006    |
| Transcriptional regulation by the AP-2 (TFAP2) family of transcription factors    | 2 / 52   | 0.004    | 0.018    | 0.179 | 2 / 44    | 0.003    |
| PKA-mediated phosphorylation of key metabolic factors                             | 1 / 7    | 4.81e-04 | 0.027    | 0.216 | 1 / 5     | 3.70e-04 |
| IRF3 mediated activation of type I IFN                                            | 1 / 7    | 4.81e-04 | 0.027    | 0.216 | 1 / 6     | 4.44e-04 |
| Lactose synthesis                                                                 | 1 / 8    | 5.50e-04 | 0.031    | 0.216 | 1 / 3     | 2.22e-04 |
| PP2A-mediated dephosphorylation of key metabolic factors                          | 1 / 9    | 6.19e-04 | 0.035    | 0.222 | 1 / 4     | 2.96e-04 |
| Calcitonin-like ligand receptors                                                  | 1 / 11   | 7.56e-04 | 0.042    | 0.222 | 1 / 4     | 2.96e-04 |
| Glycine degradation                                                               | 1 / 15   | 0.001    | 0.057    | 0.222 | 1 / 3     | 2.22e-04 |
| Transcriptional regulation of white adipocyte differentiation                     | 2 / 109  | 0.007    | 0.068    | 0.222 | 1 / 18    | 0.001    |
| Glycolysis                                                                        | 2 / 110  | 0.008    | 0.069    | 0.222 | 3 / 24    | 0.002    |
| IRF3-mediated induction of type I IFN                                             | 1 / 19   | 0.001    | 0.072    | 0.222 | 1 / 5     | 3.70e-04 |
| Receptor-type tyrosine-protein phosphatases                                       | 1 / 20   | 0.001    | 0.075    | 0.222 | 1 / 6     | 4.44e-04 |
| Regulation of innate immune responses to cytosolic DNA                            | 1 / 21   | 0.001    | 0.079    | 0.222 | 4 / 9     | 6.66e-04 |
| Serotonin Neurotransmitter Release Cycle                                          | 1 / 23   | 0.002    | 0.086    | 0.222 | 2 / 4     | 2.96e-04 |
| ZBP1(DAI) mediated induction of type I IFNs                                       | 1 / 23   | 0.002    | 0.086    | 0.222 | 1 / 11    | 8.14e-04 |
| STING mediated induction of host immune responses                                 | 1 / 24   | 0.002    | 0.09     | 0.222 | 1 / 19    | 0.001    |
| Acetylcholine Neurotransmitter Release Cycle                                      | 1 / 26   | 0.002    | 0.097    | 0.222 | 2 / 6     | 4.44e-04 |

**Figure S3** Reactome software tool analysis of specific molecular pathways or sub-pathways where some genes of **normoxic (S5) HUVEC-SIRT6** (versus normoxic (S3) HUVEC-PBP sample) were found among the 25 most relevant pathways. At least 3 genes were found in pool genes involved in specific pathways (indicated by the arrows).

| The following table shows the 25 most relevant pathways sorted by p-value.                      |          |       |         |       |           |          |
|-------------------------------------------------------------------------------------------------|----------|-------|---------|-------|-----------|----------|
| Pathway name                                                                                    | Entities |       |         |       | Reactions |          |
|                                                                                                 | found    | ratio | p-value | FDR*  | found     | ratio    |
| Pre-NOTCH Transcription and Translation                                                         | 3 / 62   | 0.005 | 0.003   | 0.091 | 3 / 28    | 0.002    |
| Pre-NOTCH Expression and Processing                                                             | 3 / 78   | 0.007 | 0.005   | 0.091 | 3 / 38    | 0.003    |
| Processing of DNA double-strand break ends                                                      | 3 / 81   | 0.007 | 0.006   | 0.091 | 3 / 17    | 0.001    |
| RNA Polymerase I Promoter Opening                                                               | 2 / 32   | 0.003 | 0.009   | 0.091 | 1 / 2     | 1.48e-04 |
| Packaging Of Telomere Ends                                                                      | 2 / 33   | 0.003 | 0.009   | 0.091 | 2 / 2     | 1.48e-04 |
| DNA methylation                                                                                 | 2 / 34   | 0.003 | 0.01    | 0.091 | 7 / 7     | 5.18e-04 |
| Activated PKN1 stimulates transcription of AR (androgen receptor) regulated genes KLK2 and KLK3 | 2 / 36   | 0.003 | 0.011   | 0.091 | 8 / 11    | 8.14e-04 |
| SIRT1 negatively regulates rRNA expression                                                      | 2 / 37   | 0.003 | 0.012   | 0.091 | 3 / 5     | 3.70e-04 |
| Cleavage of the damaged purine                                                                  | 2 / 38   | 0.003 | 0.012   | 0.091 | 2 / 9     | 6.66e-04 |
| Depurination                                                                                    | 2 / 39   | 0.003 | 0.013   | 0.091 | 4 / 19    | 0.001    |
| Recognition and association of DNA glycosylase with site containing an affected purine          | 2 / 39   | 0.003 | 0.013   | 0.091 | 2 / 10    | 7.40e-04 |
| HDR through Homologous Recombination (HRR) or Single Strand Annealing (SSA)                     | 3 / 114  | 0.01  | 0.014   | 0.091 | 3 / 42    | 0.003    |
| PRC2 methylates histones and DNA                                                                | 2 / 42   | 0.004 | 0.015   | 0.091 | 4 / 4     | 2.96e-04 |
| Defective pyroptosis                                                                            | 2 / 42   | 0.004 | 0.015   | 0.091 | 1 / 3     | 2.22e-04 |
| Cleavage of the damaged pyrimidine                                                              | 2 / 42   | 0.004 | 0.015   | 0.091 | 1 / 20    | 0.001    |
| Depyrimidination                                                                                | 2 / 42   | 0.004 | 0.015   | 0.091 | 2 / 41    | 0.003    |
| Recognition and association of DNA glycosylase with site containing an affected pyrimidine      | 2 / 42   | 0.004 | 0.015   | 0.091 | 1 / 21    | 0.002    |
| Homology Directed Repair                                                                        | 3 / 120  | 0.01  | 0.016   | 0.091 | 3 / 50    | 0.004    |
| Condensation of Prophase Chromosomes                                                            | 2 / 45   | 0.004 | 0.017   | 0.091 | 8 / 10    | 7.40e-04 |
| ERCC6 (CSB) and EHMT2 (G9a) positively regulate rRNA expression                                 | 2 / 45   | 0.004 | 0.017   | 0.091 | 2 / 4     | 2.96e-04 |
| Base-Excision Repair, AP Site Formation                                                         | 2 / 46   | 0.004 | 0.018   | 0.091 | 6 / 62    | 0.005    |
| Inhibition of DNA recombination at telomere                                                     | 2 / 48   | 0.004 | 0.019   | 0.091 | 3 / 4     | 2.96e-04 |
| Nonhomologous End-Joining (NHEJ)                                                                | 2 / 52   | 0.004 | 0.022   | 0.091 | 4 / 13    | 9.62e-04 |
| Deposition of new CENPA-containing nucleosomes at the centromere                                | 2 / 54   | 0.005 | 0.024   | 0.091 | 2 / 4     | 2.96e-04 |
| Nucleosome assembly                                                                             | 2 / 54   | 0.005 | 0.024   | 0.091 | 2 / 4     | 2.96e-04 |

**Figure S4.** Uncropped images of western blot results shown in **Figure 2c** and in **Figure 8**.

In each image, the *lanes* that have been used for the final version of Figure 2c and the final version of Figure 8 have been indicated with the symbol §.

**Uncropped Figure 2c**

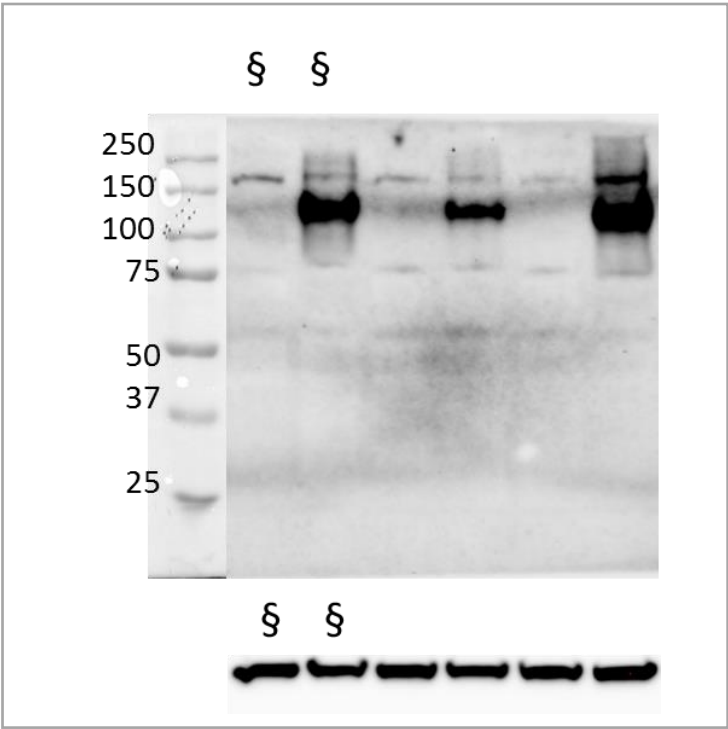

**Uncropped Figure 8**

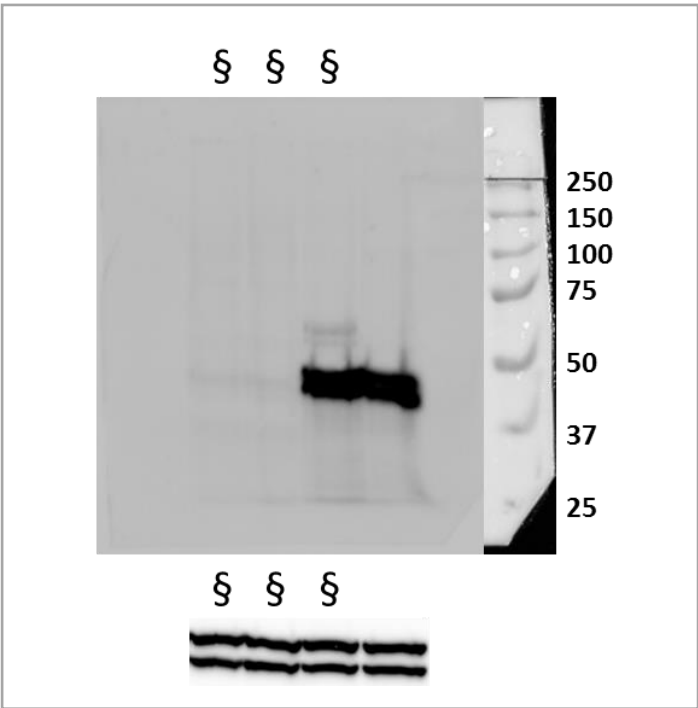

Supplement: s1 [file s1]
